# Supplementary material for: Characterization of A Murine Model of Endothelial Dysfunction Induced by Chronic Intraperitoneal Administration of Angiotensin II
Source: Research Square preprint supplement (doi:10.21203/rs.3.rs-115181/v1), 2020-12-04
Supplement: Supplementary file 2 [file baec3c6cb1a6bee9070c68ef.docx]

**Characterization of a murine model of endothelial dysfunction induced by chronic intraperitoneal administration of angiotensin II**

Celeste Trejo-Moreno1, Enrique Jiménez-Ferrer2,*, Gabriela Castro-Martínez3, Marisol Méndez-Martínez3, María Angélica Santana4, Gerardo Arrellín-Rosas3,5, José Pedraza-Chaverri6, Omar N. Medina-Campos6, Beatriz Hernández-Téllez7, Joel Barrita-Cruz3, , Oscar Ramírez-Pliego4, Maribel Herrera-Ruíz2, Gladis Fragoso8, Gabriela Rosas-Salgado3,*.

1 Postdoctoral stay in the Posgrado en Biología Experimental, Universidad Autónoma Metropolitana-Iztapalapa, Ciudad de México, 09640, México.

2 Centro de Investigación Biomédica del Sur, Instituto Mexicano del Seguro Social, Xochitepec, Morelos, 62790, México.

3 Facultad de Medicina, Universidad Autónoma del Estado de Morelos, Cuernavaca, Morelos, 62350, México.

4 Centro de Investigación en Dinámica Celular, Universidad Autónoma del Estado de Morelos, Cuernavaca, Morelos, 62209, México.

5 Facultad de Ciencias de la Salud, Universidad Panamericana, Ciudad de México, 03920, México.

6 Facultad de Química, Universidad Nacional Autónoma de México, Ciudad de México, 04510, México.

7 Facultad de Medicina, Universidad Nacional Autónoma de México, Ciudad de México, CP, 04510, México.

8 Instituto de Investigaciones Biomédicas, Universidad Nacional Autónoma de México, Ciudad de México, 04510, México.

* Corresponding authors

E-mail: [gabriela.rosas@uaem.com.mx](mailto:gabriela.rosas@uaem.com.mx) (GRS), [enriqueferrer_mx@yahoo.com](mailto:enriqueferrer_mx@yahoo.com) (EJF)

**
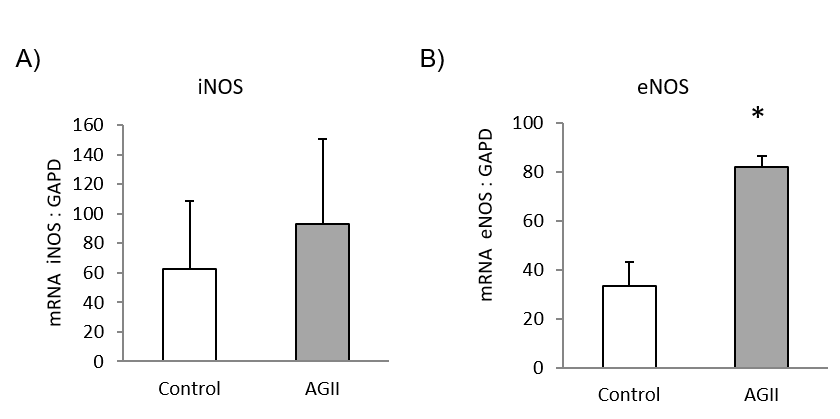
**

**Supplementary Figure S1. Chronic AGII administration increases the expression of eNOS mRNA but not iNOS mRNA.** Data are reported as mean ± SD and analyzed with a two-tailed, unpaired Student's t test (P < 0.05). * indicate differences with respect to control.

**
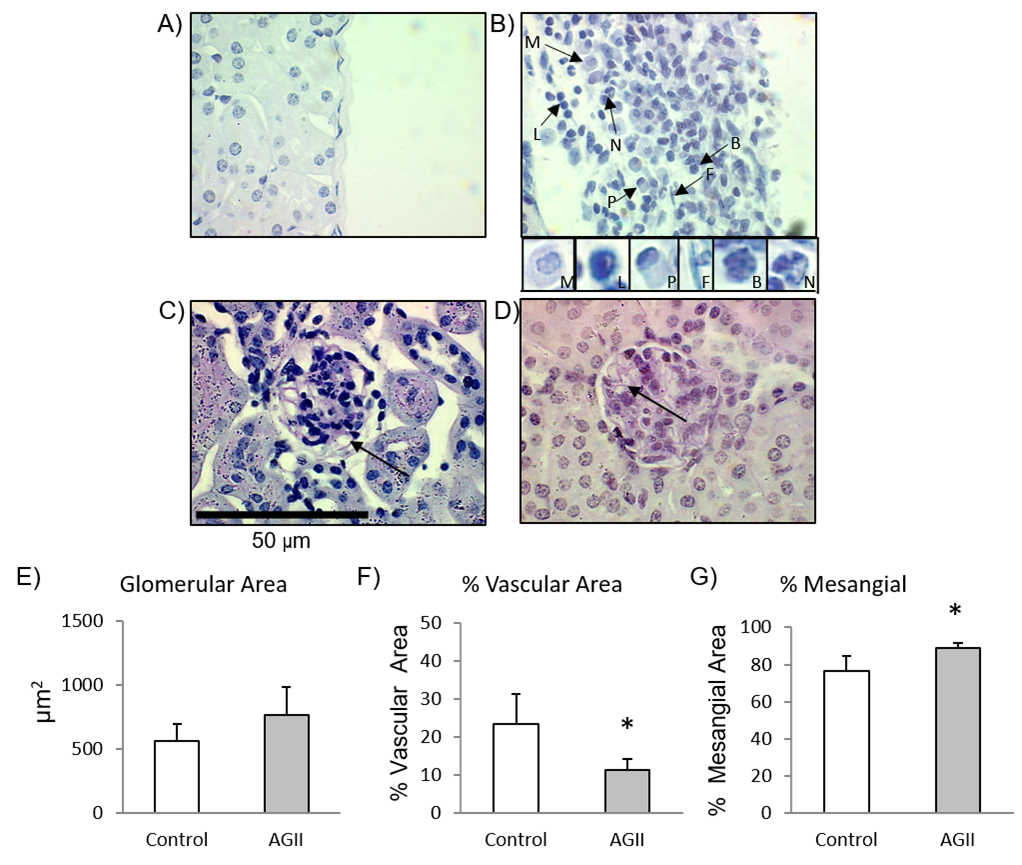
**

**Supplementary Figure S2. Evaluation of glomerular damage by PAS staining**. A-B) Renal capsule. C-D) Glomeruli. E-G) Analysis of glomerular area and percentage of vascular y mesangial glomerular areas. A decrease in glomerular vascular and a mesangial expansion were observed in AGII-treated mice (F-G). Arrows indicate vascular areas. M: macrophages; L: lymphocytes; P: plasmatic cells; F: fibroblasts, B: basophiles; N: neutrophils. Microphotographs taken at 100X. Data are reported as mean ± SD and analyzed with a two-tailed, unpaired Student's t test (P < 0.05). * indicate differences with respect to control.

**
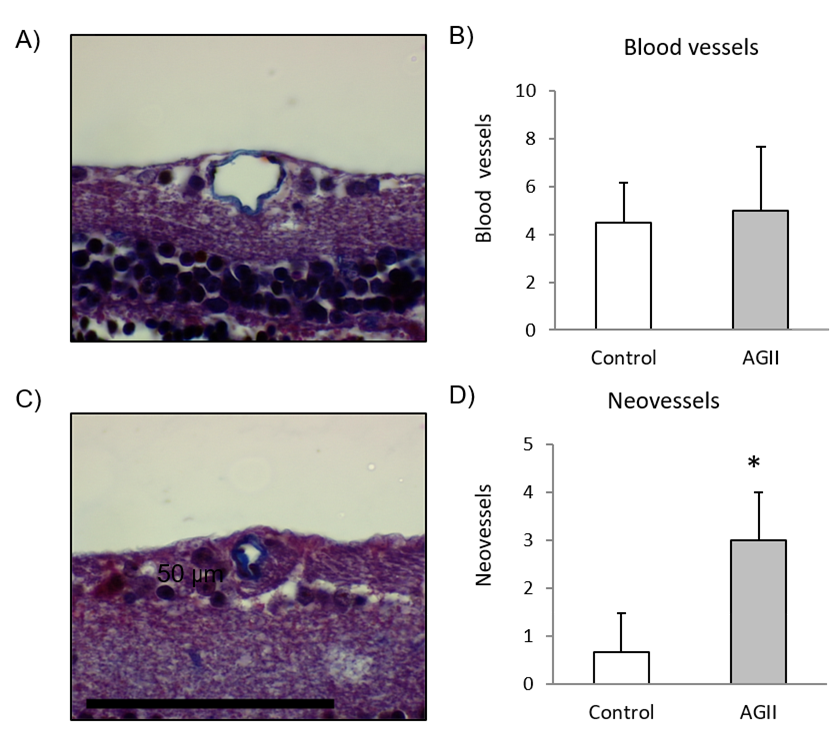
**

**Supplementary Figure S3. Retinal neovascularization induced by AGII.** A-B) Vessels. C-D) Neovessels. A chronic AGII administration failed to alter the number of retinal vessels already formed; however, it induced the formation of new vessels, increasing its number 4-fold with respect to the control group (D). Data are reported as mean ± SD and analyzed with a two-tailed, unpaired Student's t test (P < 0.05). * indicate differences with respect to control.
